# Supplementary material for: Discrepancy between pregnancy dating methods affects obstetric and neonatal outcomes: a population-based register cohort study
Source: PubMed Central journal article supplement (PMC5932022; doi:10.1038/s41598-018-24894-y), 2018-05-02
Supplement: 41598_2018_24894_MOESM1_ESM.pdf [file 41598_2018_24894_MOESM1_ESM.pdf]

Title: **Discrepancy between pregnancy dating methods affects obstetric and neonatal outcomes: a population-based register cohort study**

**Short title:** Dating discrepancy

**KEYWORDS:** pregnancy dating, pregnancy, gestational age, fetal ultrasonography, prenatal, menstruation, female

**Authors:**

Merit Kullinger\*, MD, Center for Clinical Research, Västmanland County Hospital, Västerås, Sweden.

Michaela Granfors, MD, PhD, Department of Medicine, Clinical Epidemiology Unit, Karolinska Institutet; Department of Clinical Science, Karolinska Institutet Danderyd Hospital, Stockholm, Sweden.

Helle Kieler, MD, PhD, Professor, Centre for Pharmacoepidemiology (CPE), Department of Medicine, Solna, Karolinska Institutet, Stockholm, Sweden.

Alkistis Skalkidou, MD, PhD, Professor, Department of Women's and Children's Health, Uppsala University, Sweden.

**\*Corresponding author:**

Merit Kullinger

Kvinnokliniken, Västmanlands sjukhus, 721 89 Västerås, Sweden

+46-21-173000, +46-73-3106360

E-mail: [merit.kullinger@kbh.uu.se](mailto:merit.kullinger@kbh.uu.se)

**Supplementary table 1.** ICD-9 and ICD-10 codes for the included pregnancy, delivery, and neonatal outcomes.

**Preeclampsia (6424, 642, O14)**

ICD-9: 6424 Mild or unspecified pre-eclampsia  
6425 Severe pre-eclampsia

ICD-10: O14.0 Moderate pre-eclampsia  
O14.1 Severe pre-eclampsia  
O14.2 HELLP syndrome  
O14.0 Pre-eclampsia, unspecified

**Diabetes mellitus in pregnancy (6480, O24)**

ICD-9: 6480 Diabetes mellitus complicating pregnancy, childbirth or the puerperium

ICD-10: O24.0 Pre-existing diabetes mellitus, insulin-dependent  
O24.1 Pre-existing diabetes mellitus, non-insulin-dependent  
O24.2 Pre-existing malnutrition-related diabetes mellitus  
O24.3 Pre-existing diabetes mellitus, unspecified  
O24.4 Diabetes mellitus arising in pregnancy, including gestational diabetes mellitus NOS  
O24.9 Diabetes mellitus in pregnancy, unspecified

**Prolonged second stage of labor (6622, O63.1)**

ICD-9: 6622 Prolonged second stage of labor

ICD-10: O63.1 Prolonged second stage of labor

**Delivery by forceps or vacuum extractor (6695, O81)**

ICD-9: 6695 Forceps or vacuum extractor delivery

ICD-10: O81.0 Low forceps delivery  
O81.1 Mid-cavity forceps delivery  
O81.2 Mid-cavity forceps with rotation  
O81.3 Other and unspecified forceps delivery  
O81.4 Vacuum extractor delivery  
O81.5 Delivery by combination of forceps and vacuum extractor

**Delivery by cesarean section (6697, O82)**

ICD-9: 6697 Cesarean delivery

ICD-10: O82.0 Delivery by elective caesarean section  
O82.1 Delivery by emergency caesarean section  
O82.2 Delivery by caesarean hysterectomy  
O82.8 Other single delivery by caesarean section  
O82.9 Delivery by caesarean section, unspecified

**Shoulder dystocia (6604, O66.0)**

ICD-9: 6604 Shoulder dystocia during labor and delivery

ICD-10: O66.0 Obstructed labor due to shoulder dystocia, impacted shoulders

**Postpartum hemorrhage (666, O72)**

ICD-9: 6660 Third-stage postpartum hemorrhage  
6661 Other immediate postpartum hemorrhage  
6662 Delayed and secondary postpartum hemorrhage  
6663 Postpartum coagulation defects

ICD-10: O72.0 Third-stage hemorrhage associated with retained, trapped or adherent placenta  
O72.1 Other immediate postpartum hemorrhage, including atonic hemorrhage  
O72.2 Delayed and secondary postpartum hemorrhage  
O72.3 Postpartum coagulation defects

**Perineal laceration: third or fourth degree (6642, 6643, O70.2, O70.3)**

ICD-9: 6642 Third-degree perineal laceration during delivery  
6643 Fourth-degree perineal laceration during delivery  
ICD-10: O70.2 Third degree perineal laceration during delivery  
O70.3 Fourth degree perineal laceration during delivery

**Birth asphyxia (7685, P21.0)**

ICD-9: 7685 Severe birth asphyxia  
ICD-10: P21.0 Severe birth asphyxia

**Supplementary table 2.** Risks of specific adverse obstetric outcomes and neonatal outcomes according to the size of the discrepancy between dating by ultrasound examination and by last menstrual period (n = 1 100 049): crude and four adjusted models.

|                                              | Prevalence<br>(n/100 000 births) | Large negative discrepancy<br>n = 119 275 |             | Small negative discrepancy<br>n = 238 929 |             | Small positive discrepancy<br>n = 110 952 |             | Large positive discrepancy<br>n = 113 236 |             |  |
|----------------------------------------------|----------------------------------|-------------------------------------------|-------------|-------------------------------------------|-------------|-------------------------------------------|-------------|-------------------------------------------|-------------|--|
|                                              |                                  | OR                                        | (95% CI)    | OR                                        | (95% CI)    | OR                                        | (95% CI)    | OR                                        | (95% CI)    |  |
| <b>Pregnancy or delivery outcomes</b>        |                                  |                                           |             |                                           |             |                                           |             |                                           |             |  |
| Preeclampsia                                 |                                  |                                           |             |                                           |             |                                           |             |                                           |             |  |
| Unadjusted model                             | 3377                             | 1.23                                      | (1.19–1.27) | 1.13                                      | (1.10–1.16) | 0.96                                      | (0.93–1.00) | 0.97                                      | (0.94–1.01) |  |
| Model 1                                      |                                  | 1.19                                      | (1.15–1.23) | 1.09                                      | (1.06–1.12) | 0.98                                      | (0.94–1.02) | 0.98                                      | (0.95–1.02) |  |
| Model 2                                      |                                  | 1.20                                      | (1.15–1.24) | 1.10                                      | (1.07–1.13) | 0.98                                      | (0.94–1.02) | 0.98                                      | (0.94–1.02) |  |
| Model 3                                      |                                  | 1.18                                      | (1.14–1.22) | 1.09                                      | (1.06–1.12) | 0.98                                      | (0.94–1.02) | 0.98                                      | (0.94–1.02) |  |
| Model 4                                      |                                  | 1.13                                      | (1.09–1.17) | 1.06                                      | (1.03–1.09) | 1.00                                      | (0.96–1.04) | 1.00                                      | (0.96–1.04) |  |
| Diabetes mellitus in pregnancy               |                                  |                                           |             |                                           |             |                                           |             |                                           |             |  |
| Unadjusted model                             | 1459                             | 1.46                                      | (1.39–1.53) | 1.20                                      | (1.16–1.25) | 0.87                                      | (0.82–0.93) | 0.86                                      | (0.81–0.91) |  |
| Model 1                                      |                                  | 1.43                                      | (1.36–1.51) | 1.20                                      | (1.15–1.25) | 0.88                                      | (0.83–0.93) | 0.85                                      | (0.79–0.90) |  |
| Model 2                                      |                                  | 1.44                                      | (1.36–1.51) | 1.21                                      | (1.16–1.26) | 0.87                                      | (0.82–0.93) | 0.84                                      | (0.79–0.89) |  |
| Model 3                                      |                                  | 1.42                                      | (1.35–1.49) | 1.20                                      | (1.15–1.25) | 0.88                                      | (0.82–0.93) | 0.84                                      | (0.79–0.89) |  |
| Model 4                                      |                                  | 1.41                                      | (1.34–1.48) | 1.20                                      | (1.15–1.25) | 0.87                                      | (0.82–0.93) | 0.84                                      | (0.78–0.89) |  |
| Prolonged second stage of labor              |                                  |                                           |             |                                           |             |                                           |             |                                           |             |  |
| Unadjusted model                             | 720                              | 0.90                                      | (0.84–0.98) | 0.88                                      | (0.83–0.94) | 1.10                                      | (1.02–1.18) | 1.11                                      | (1.03–1.19) |  |
| Model 1                                      |                                  | 0.92                                      | (0.84–0.99) | 0.88                                      | (0.83–0.94) | 1.10                                      | (1.02–1.18) | 1.11                                      | (1.03–1.20) |  |
| Model 2                                      |                                  | 0.92                                      | (0.84–0.99) | 0.88                                      | (0.83–0.94) | 1.09                                      | (1.01–1.18) | 1.11                                      | (1.03–1.20) |  |
| Model 3                                      |                                  | 0.92                                      | (0.84–0.99) | 0.88                                      | (0.83–0.94) | 1.10                                      | (1.01–1.18) | 1.11                                      | (1.03–1.20) |  |
| Model 4                                      |                                  | 0.92                                      | (0.85–1.00) | 0.88                                      | (0.83–0.94) | 1.09                                      | (1.01–1.18) | 1.10                                      | (1.02–1.19) |  |
| Delivery by forceps or vacuum extractor*     |                                  |                                           |             |                                           |             |                                           |             |                                           |             |  |
| Unadjusted model                             | 6564                             | 0.88                                      | (0.85–0.90) | 0.90                                      | (0.88–0.92) | 1.10                                      | (1.07–1.13) | 1.11                                      | (1.09–1.14) |  |
| Model 1                                      |                                  | 0.89                                      | (0.87–0.92) | 0.91                                      | (0.89–0.93) | 1.10                                      | (1.07–1.13) | 1.13                                      | (1.10–1.16) |  |
| Model 2                                      |                                  | 0.91                                      | (0.88–0.93) | 0.92                                      | (0.90–0.94) | 1.08                                      | (1.05–1.10) | 1.09                                      | (1.06–1.12) |  |
| Model 3                                      |                                  | 0.91                                      | (0.88–0.93) | 0.92                                      | (0.90–0.94) | 1.08                                      | (1.05–1.10) | 1.09                                      | (1.06–1.12) |  |
| Model 4                                      |                                  | 0.91                                      | (0.88–0.93) | 0.92                                      | (0.90–0.94) | 1.08                                      | (1.05–1.10) | 1.09                                      | (1.07–1.12) |  |
| Delivery by cesarean section                 |                                  |                                           |             |                                           |             |                                           |             |                                           |             |  |
| Unadjusted model                             | 13 289                           | 0.92                                      | (0.90–0.94) | 0.93                                      | (0.92–0.95) | 1.02                                      | (1.00–1.03) | 1.00                                      | (0.98–1.02) |  |
| Model 1                                      |                                  | 0.96                                      | (0.94–0.98) | 0.95                                      | (0.94–0.97) | 1.00                                      | (0.98–1.02) | 0.98                                      | (0.96–1.00) |  |
| Model 2                                      |                                  | 0.97                                      | (0.95–0.99) | 0.96                                      | (0.95–0.97) | 0.99                                      | (0.97–1.01) | 0.97                                      | (0.95–0.99) |  |
| Model 3                                      |                                  | 0.95                                      | (0.93–0.97) | 0.95                                      | (0.94–0.97) | 1.00                                      | (0.98–1.02) | 0.97                                      | (0.95–0.99) |  |
| Model 4                                      |                                  | 0.93                                      | (0.91–0.95) | 0.94                                      | (0.93–0.96) | 1.00                                      | (0.98–1.02) | 0.98                                      | (0.96–1.00) |  |
| Delivery by emergency cesarean section**     |                                  |                                           |             |                                           |             |                                           |             |                                           |             |  |
| Unadjusted model                             | 6778                             | 0.95                                      | (0.93–0.97) | 0.95                                      | (0.94–0.97) | 1.03                                      | (1.00–1.06) | 1.02                                      | (1.00–1.05) |  |
| Model 1                                      |                                  | 0.97                                      | (0.94–1.00) | 0.97                                      | (0.95–0.99) | 1.02                                      | (1.00–1.05) | 1.02                                      | (0.99–1.04) |  |
| Model 2                                      |                                  | 0.98                                      | (0.96–1.01) | 0.98                                      | (0.96–1.00) | 1.01                                      | (0.98–1.03) | 0.99                                      | (0.97–1.02) |  |
| Model 3                                      |                                  | 0.97                                      | (0.94–1.00) | 0.97                                      | (0.95–0.99) | 1.01                                      | (0.98–1.04) | 1.00                                      | (0.97–1.02) |  |
| Model 4                                      |                                  | 0.96                                      | (0.93–0.98) | 0.97                                      | (0.95–0.99) | 1.01                                      | (0.99–1.04) | 1.00                                      | (0.97–1.02) |  |
| Shoulder dystocia*                           |                                  |                                           |             |                                           |             |                                           |             |                                           |             |  |
| Unadjusted model                             | 202                              | 1.12                                      | (0.97–1.28) | 0.95                                      | (0.85–1.07) | 1.02                                      | (0.88–1.18) | 1.16                                      | (1.01–1.33) |  |
| Model 1                                      |                                  | 1.12                                      | (0.97–1.29) | 0.98                                      | (0.87–1.10) | 1.07                                      | (0.92–1.24) | 1.13                                      | (0.97–1.30) |  |
| Model 2                                      |                                  | 1.16                                      | (1.00–1.34) | 1.01                                      | (0.90–1.14) | 1.02                                      | (0.88–1.19) | 1.06                                      | (0.91–1.22) |  |
| Model 3                                      |                                  | 1.13                                      | (0.98–1.31) | 1.00                                      | (0.89–1.13) | 1.03                                      | (0.88–1.20) | 1.07                                      | (0.92–1.23) |  |
| Model 4                                      |                                  | 1.13                                      | (0.97–1.31) | 1.00                                      | (0.89–1.13) | 1.03                                      | (0.88–1.19) | 1.05                                      | (0.90–1.22) |  |
| Postpartum hemorrhage                        |                                  |                                           |             |                                           |             |                                           |             |                                           |             |  |
| Unadjusted model                             | 5661                             | 0.92                                      | (0.90–0.95) | 0.93                                      | (0.91–0.95) | 1.06                                      | (1.04–1.09) | 1.13                                      | (1.10–1.16) |  |
| Model 1                                      |                                  | 0.93                                      | (0.90–0.95) | 0.93                                      | (0.91–0.95) | 1.06                                      | (1.03–1.09) | 1.13                                      | (1.10–1.16) |  |
| Model 2                                      |                                  | 0.92                                      | (0.89–0.95) | 0.92                                      | (0.90–0.94) | 1.08                                      | (1.05–1.11) | 1.15                                      | (1.12–1.18) |  |
| Model 3                                      |                                  | 0.92                                      | (0.89–0.94) | 0.92                                      | (0.90–0.94) | 1.08                                      | (1.05–1.11) | 1.15                                      | (1.12–1.18) |  |
| Model 4                                      |                                  | 0.92                                      | (0.89–0.95) | 0.92                                      | (0.90–0.94) | 1.07                                      | (1.04–1.11) | 1.15                                      | (1.12–1.18) |  |
| Perineal laceration: third or fourth degree* |                                  |                                           |             |                                           |             |                                           |             |                                           |             |  |
| Unadjusted model                             | 3100                             | 0.85                                      | (0.82–0.88) | 0.88                                      | (0.85–0.90) | 1.12                                      | (1.08–1.16) | 1.13                                      | (1.09–1.17) |  |
| Model 1                                      |                                  | 0.87                                      | (0.83–0.91) | 0.88                                      | (0.85–0.91) | 1.13                                      | (1.09–1.17) | 1.15                                      | (1.11–1.19) |  |
| Model 2                                      |                                  | 0.88                                      | (0.85–0.92) | 0.89                                      | (0.86–0.92) | 1.11                                      | (1.07–1.15) | 1.12                                      | (1.08–1.16) |  |
| Model 3                                      |                                  | 0.88                                      | (0.85–0.92) | 0.89                                      | (0.86–0.92) | 1.11                                      | (1.07–1.15) | 1.12                                      | (1.08–1.16) |  |
| Model 4                                      |                                  | 0.89                                      | (0.85–0.92) | 0.89                                      | (0.87–0.92) | 1.10                                      | (1.06–1.15) | 1.12                                      | (1.08–1.16) |  |
| <b>Neonatal outcomes</b>                     |                                  |                                           |             |                                           |             |                                           |             |                                           |             |  |
| Apgar score <7 at 5 minutes                  |                                  |                                           |             |                                           |             |                                           |             |                                           |             |  |
| Unadjusted model                             | 557                              | 1.18                                      | (1.09–1.27) | 1.03                                      | (0.97–1.10) | 0.91                                      | (0.83–1.00) | 1.00                                      | (0.91–1.10) |  |
| Model 1                                      |                                  | 1.18                                      | (1.09–1.29) | 1.03                                      | (0.96–1.10) | 0.90                                      | (0.81–0.99) | 0.96                                      | (0.87–1.06) |  |
| Model 2                                      |                                  | 1.21                                      | (1.12–1.32) | 1.06                                      | (0.99–1.13) | 0.88                                      | (0.79–0.97) | 0.93                                      | (0.84–1.03) |  |
| Model 3                                      |                                  | 1.20                                      | (1.10–1.30) | 1.05                                      | (0.98–1.12) | 0.88                                      | (0.79–0.97) | 0.93                                      | (0.84–1.03) |  |
| Model 4                                      |                                  | 1.17                                      | (1.08–1.27) | 1.04                                      | (0.97–1.12) | 0.88                                      | (0.80–0.98) | 0.94                                      | (0.85–1.04) |  |
| Birth asphyxia                               |                                  |                                           |             |                                           |             |                                           |             |                                           |             |  |
| Unadjusted model                             | 987                              | 1.18                                      | (1.11–1.25) | 1.03                                      | (0.98–1.08) | 1.02                                      | (0.96–1.09) | 1.07                                      | (1.00–1.14) |  |
| Model 1                                      |                                  | 1.18                                      | (1.10–1.25) | 1.00                                      | (0.95–1.06) | 1.01                                      | (0.94–1.09) | 1.05                                      | (0.97–1.12) |  |
| Model 2                                      |                                  | 1.20                                      | (1.13–1.28) | 1.03                                      | (0.97–1.08) | 0.99                                      | (0.92–1.06) | 1.01                                      | (0.94–1.08) |  |
| Model 3                                      |                                  | 1.19                                      | (1.12–1.27) | 1.02                                      | (0.97–1.08) | 0.99                                      | (0.92–1.06) | 1.01                                      | (0.94–1.08) |  |
| Model 4                                      |                                  | 1.17                                      | (1.10–1.25) | 1.01                                      | (0.95–1.06) | 0.99                                      | (0.93–1.07) | 1.01                                      | (0.94–1.09) |  |
| Intrauterine fetal death                     |                                  |                                           |             |                                           |             |                                           |             |                                           |             |  |
| Unadjusted model                             | 274                              | 1.47                                      | (1.32–1.64) | 1.24                                      | (1.14–1.36) | 0.87                                      | (0.75–0.99) | 0.89                                      | (0.77–1.01) |  |
| Model 1                                      |                                  | 1.49                                      | (1.33–1.67) | 1.21                                      | (1.10–1.34) | 0.86                                      | (0.74–1.00) | 0.87                                      | (0.75–1.00) |  |
| Model 2                                      |                                  | 1.49                                      | (1.33–1.67) | 1.22                                      | (1.10–1.34) | 0.87                                      | (0.75–1.00) | 0.87                                      | (0.75–1.01) |  |
| Model 3                                      |                                  | 1.48                                      | (1.32–1.66) | 1.21                                      | (1.10–1.34) | 0.87                                      | (0.75–1.00) | 0.87                                      | (0.75–1.01) |  |
| Model 4                                      |                                  | 1.35                                      | (1.20–1.52) | 1.15                                      | (1.04–1.27) | 0.92                                      | (0.79–1.06) | 0.91                                      | (0.79–1.06) |  |
| Neonatal death                               |                                  |                                           |             |                                           |             |                                           |             |                                           |             |  |
| Unadjusted model                             | 141                              | 2.19                                      | (1.91–2.50) | 1.26                                      | (1.10–1.43) | 0.89                                      | (0.73–1.08) | 1.00                                      | (0.82–1.20) |  |
| Model 1                                      |                                  | 2.22                                      | (1.91–2.56) | 1.24                                      | (1.08–1.42) | 0.81                                      | (0.64–1.00) | 0.91                                      | (0.74–1.12) |  |
| Model 2                                      |                                  | 2.27                                      | (1.96–2.63) | 1.27                                      | (1.10–1.46) | 0.78                                      | (0.63–0.97) | 0.88                                      | (0.71–1.07) |  |
| Model 3                                      |                                  | 2.24                                      | (1.94–2.60) | 1.26                                      | (1.10–1.45) | 0.78                                      | (0.63–0.97) | 0.88                                      | (0.71–1.07) |  |
| Model 4                                      |                                  | 2.03                                      | (1.74–2.37) | 1.13                                      | (0.97–1.31) | 0.80                                      | (0.63–1.00) | 0.90                                      | (0.73–1.11) |  |
| Small for gestational age                    |                                  |                                           |             |                                           |             |                                           |             |                                           |             |  |
| Unadjusted model                             | 2169                             | 1.54                                      | (1.48–1.60) | 1.31                                      | (1.26–1.35) | 0.81                                      | (0.77–0.86) | 0.82                                      | (0.78–0.87) |  |
| Model 1                                      |                                  | 1.50                                      | (1.44–1.56) | 1.29                                      | (1.25–1.34) | 0.82                                      | (0.77–0.86) | 0.80                                      | (0.76–0.85) |  |
| Model 2                                      |                                  | 1.51                                      | (1.45–1.57) | 1.30                                      | (1.26–1.35) | 0.81                                      | (0.77–0.86) | 0.80                                      | (0.76–0.84) |  |
| Model 3                                      |                                  | 1.48                                      | (1.42–1.54) | 1.29                                      | (1.25–1.34) | 0.81                                      | (0.77–0.86) | 0.80                                      | (0.76–0.84) |  |
| Model 4                                      |                                  | 1.49                                      | (1.42–1.55) | 1.29                                      | (1.25–1.34) | 0.82                                      | (0.77–0.86) | 0.80                                      | (0.76–0.84) |  |

|                           |      |      |             |      |             |      |             |      |             |
|---------------------------|------|------|-------------|------|-------------|------|-------------|------|-------------|
| Large for gestational age |      |      |             |      |             |      |             |      |             |
| Unadjusted model          | 3617 | 1.10 | (1.06–1.14) | 1.04 | (1.01–1.07) | 1.02 | (0.99–1.06) | 1.02 | (0.99–1.06) |
| Model 1                   |      | 1.07 | (1.03–1.11) | 1.03 | (1.00–1.06) | 1.03 | (0.99–1.07) | 1.03 | (0.99–1.07) |
| Model 2                   |      | 1.07 | (1.03–1.11) | 1.03 | (1.00–1.06) | 1.03 | (1.00–1.07) | 1.04 | (1.00–1.08) |
| Model 3                   |      | 1.04 | (1.00–1.08) | 1.01 | (0.99–1.04) | 1.04 | (1.00–1.08) | 1.05 | (1.01–1.09) |
| Model 4                   |      | 1.05 | (1.01–1.09) | 1.02 | (0.99–1.05) | 1.04 | (1.00–1.08) | 1.04 | (1.01–1.08) |

Logistic regression-derived crude ORs and 95% CIs for adverse obstetric and neonatal outcomes among all recorded singleton births in Sweden 1995–2010 according to the discrepancy between pregnancy dating methods. Information was obtained from the Medical Birth Register, and only those with a record of the date of last menstrual period (LMP), ultrasound (US)-based estimated date of delivery (EDD), maternal weight, and height were included in the analyses. A negative discrepancy indicates that EDD by LMP was at an earlier date than was the EDD by US; a positive discrepancy indicates that the EDD by LMP was at a later date than was the EDD by US. A large negative discrepancy was defined as below the 10<sup>th</sup> percentile, and a large positive discrepancy as above the 90<sup>th</sup> percentile in the discrepancy distribution. The reference category (n = 517 657) was defined as discrepancies within 2 days of the median. The intermediate groups were defined as small negative and small positive discrepancies.

Effect estimates are derived from the crude and four adjusted models as follows:

Model 1: adjusted for BMI (weight (kg)/height (m<sup>2</sup>) <18.5 kg/m<sup>2</sup> or >30 kg/m<sup>2</sup>, maternal age <20 years or >30 years, smoking or snuff use, living without a partner, or not being employed.

Model 2: same as model 1, but adding fetal sex, with female as the reference category.

Model 3: same as model 2, but adding the diagnosis of diabetes mellitus and preeclampsia during the current pregnancy as separate covariates.

Model 4: same as model 3, but adding SGA or LGA at birth.

\*excluding deliveries by cesarean section; \*\*excluding elective cesarean section.

OR, odds ratio; CI, confidence interval
